# Supplementary material
Source: Springer Nature journal article supplement (https://www.springermedizin.de/resource/supplementary/12936_2012_2145_MOESM3_ESM.pdf/9542672)

**A****IL-10**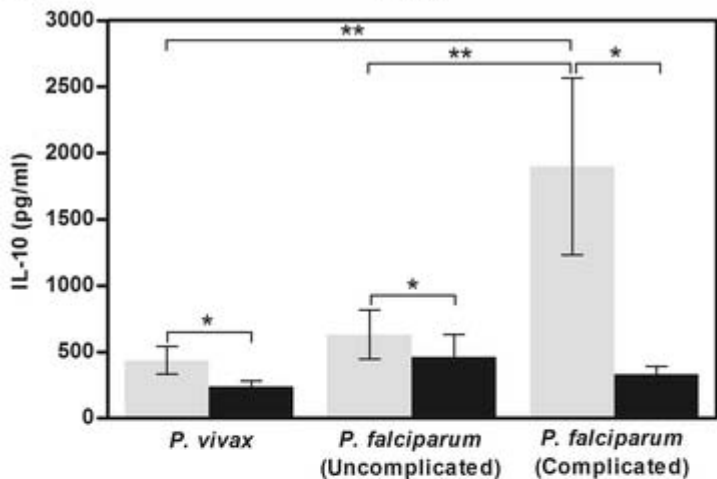**B****TNF- $\alpha$** 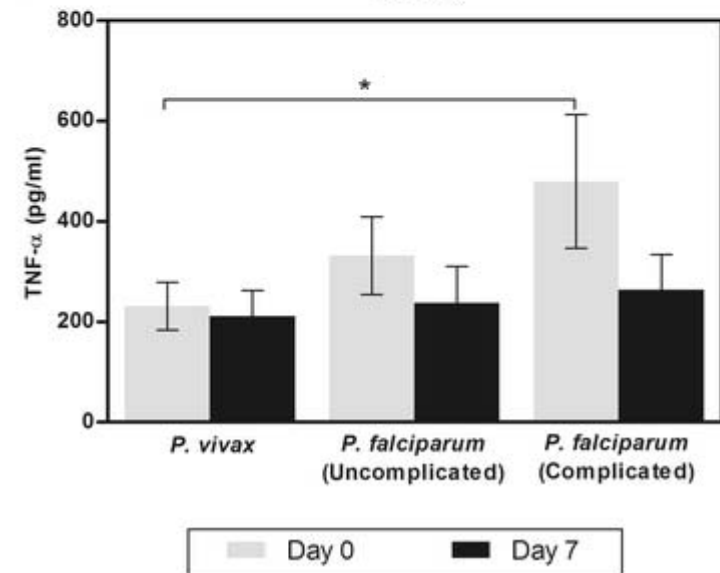

Supplement: MOESM3 [file 9542672]
